# Supplementary material
Source: PubMed Central journal article supplement (PMC3345047)
Supplement: NIHMS365903-supplement-Supp_Table_S1-S2.pdf [file NIHMS365903-supplement-Supp_Table_S1-S2.pdf]

**The Missing Link in Coenzyme A Biosynthesis: PanM (formerly YhhK), a Yeast GCN5 Acetyltransferase Homolog Triggers Aspartate Decarboxylase (PanD) Maturation in *Salmonella enterica***

**Tara N. Stuecker, Kelsey M. Hodge, and Jorge C. Escalante-Semerena\***  
Department of Bacteriology, University of Wisconsin  
1550 Linden Drive, Madison, WI 53706-1521 USA

Running title: PanM triggers pro-PanD cleavage in *Salmonella*

\*Corresponding author: E-mail: [escalante@bact.wisc.edu](mailto:escalante@bact.wisc.edu), Tel: (+1) 608-262-7379, Fax: (+1) 608-265-7909

**Table S1: Strains and plasmids used in this study.**

| Strain <sup>a</sup> or plasmid | Genotype                                                                                                                                                                                                                       | Reference or source             |
|--------------------------------|--------------------------------------------------------------------------------------------------------------------------------------------------------------------------------------------------------------------------------|---------------------------------|
| <i>Strains</i>                 |                                                                                                                                                                                                                                |                                 |
| DM10310                        | <i>ara-9</i>                                                                                                                                                                                                                   | (Boyd <i>et al.</i> , 2008)     |
| JE12555                        | <i>ara-9 panM751::kan<sup>+</sup></i>                                                                                                                                                                                          | This work                       |
| DM380                          | <i>panD634::MudJ<sup>b</sup></i>                                                                                                                                                                                               | D. Downs                        |
| JE13233                        | <i>ara-9 panD634::MudJ</i>                                                                                                                                                                                                     | This work                       |
| JE13234                        | <i>ara-9 panD634::MudJ</i><br><i>ΔpanM752</i>                                                                                                                                                                                  | This work                       |
| AH109                          | <i>Saccharomyces cerevisiae</i><br><i>MATa trp1-901 leu2-3 ura3-52</i><br><i>his3-200 gal4Δ gal80Δ</i><br><i>LYS2::GAL1<sub>UAS</sub>-GAL1<sub>TATA</sub>-HIS3</i><br><i>URA3::MEL1<sub>UAS</sub>-MEL1<sub>TATA</sub>-lacZ</i> | Clontech                        |
| C41 (DE3)                      | <i>Escherichia coli</i> F <sup>-</sup> <i>ompT hsdSB</i><br>( <i>rB<sup>-</sup> mB<sup>-</sup></i> ) <i>gal dcm</i>                                                                                                            | Lucigen                         |
| SD300A                         | <i>aadA::araC<sub>pBADT7-1</sub> his</i>                                                                                                                                                                                       | (McKinney <i>et al.</i> , 2002) |
| JE13153                        | <i>aadA::araC<sub>pBADT7-1</sub> his</i><br><i>panM751::kan<sup>+</sup></i>                                                                                                                                                    | This work                       |
| <i>Plasmids</i>                |                                                                                                                                                                                                                                |                                 |
| pBAD24                         | Expression vector, <i>bla<sup>+</sup></i>                                                                                                                                                                                      | (Guzman <i>et al.</i> , 1995)   |
| pPAN65                         | <i>panM<sup>+</sup></i> cloned into pBAD24                                                                                                                                                                                     | This work                       |
| pPAN7                          | <i>panD</i> cloned into pBAD24                                                                                                                                                                                                 | This work                       |
| pPAN14                         | <i>panD</i> from <i>C. glutamicum</i><br>cloned into pBAD24                                                                                                                                                                    | This work                       |
| pGBKT7                         | Matchmaker™ bait plasmid,<br><i>kan<sup>+</sup></i>                                                                                                                                                                            | Clontech                        |
| pGADT7                         | Matchmaker™ prey plasmid,<br><i>bla<sup>+</sup></i>                                                                                                                                                                            | Clontech                        |
| pPAN66                         | <i>panM<sup>+</sup></i> cloned into pGADT7                                                                                                                                                                                     | This work                       |
| pPAN12                         | <i>panD<sup>+</sup></i> cloned into pGADT7                                                                                                                                                                                     | This work                       |
| pPAN67                         | <i>panM<sup>+</sup></i> cloned into pGBKT7                                                                                                                                                                                     | This work                       |
| pPAN15                         | <i>panD<sup>+</sup></i> cloned into pGBKT7                                                                                                                                                                                     | This work                       |
| pKLD66                         | Expression vector, <i>malE<sup>+</sup> bla<sup>+</sup></i>                                                                                                                                                                     | (Rocco <i>et al.</i> , 2008)    |
| pPAN68                         | <i>panM<sup>+</sup></i> cloned into pKLD66                                                                                                                                                                                     | This work                       |
| pT7-7                          | Expression vector, <i>bla<sup>+</sup></i>                                                                                                                                                                                      | (Tabor & Richardson,<br>1985)   |
| pPAN9                          | <i>panD<sup>+</sup></i> cloned into pT7-7                                                                                                                                                                                      | This work                       |

<sup>a</sup>All strains are derivatives of *Salmonella enterica* LT2, unless otherwise stated

<sup>b</sup>MudJ is an abbreviation of MudI1734 (Castilho *et al.*, 1984)

**Table S2: Primers used in this study.**

| Primer Name                | Sequence                                                         | Purpose <sup>a</sup>                                  |
|----------------------------|------------------------------------------------------------------|-------------------------------------------------------|
| panM Wanner Se F           | GTTTTTTTGGGCTAGCAGGAGGAATTCACC<br>ATGAAGCTGACCATTCTTCGT          | Deletion of <i>panM</i>                               |
| panM Wanner Se R           | GTAGGCCGGATAAGCGTCAGCGCCATCCG<br>GCTTTCTTTTACATATGAATATCCTCCTTAG | Deletion of <i>panM</i>                               |
| panM Flank F               | AACGGCATATTAAGCGGAA                                              | Verify <i>panM</i> deletion                           |
| panM Flank R               | TGATTTTCTGGCGCCTTT                                               | Verify <i>panM</i> deletion                           |
| panM for pBAD24<br>5'EcoRI | GTTTTTTTGGGCTAGCAGGAGGAATTCACC<br>ATGAAGCTGACCATTCTTCGT          | Clone <i>panM</i> into<br>pBAD24                      |
| panM for pBAD24<br>3'PstI  | AAGCTTGCATGCCTGCAGTTAGCGCTTCTC<br>CCAGCC                         | Clone <i>panM</i> into<br>pBAD24                      |
| panD for pBAD24 F          | GAGGAATTCACCATGGTACCATGATTCGCA<br>CCATGCTG                       | Clone <i>panD</i> into<br>pBAD24                      |
| panD for pBAD24 R          | GCAGGTCGACTCTAGATCAGGCAACCTGT<br>ACCGGAAT                        | Clone <i>panD</i> into<br>pBAD24                      |
| Cg panD for pBAD24 F       | CTAGCAAGAGGAATTCATGCTGCGCACCAT<br>CCTC                           | Clone <i>C. glutamicum</i><br><i>panD</i> into pBAD24 |
| Cg panD for pBAD24 R       | CCAAGCTTGCATGCCTGCAGCTAAATGCTT<br>CTCGACGTCAA                    | Clone <i>C. glutamicum</i><br><i>panD</i> into pBAD24 |
| pBAD Seq F                 | CTGTTTCTCCATACCCGTT                                              | Sequencing inserts in<br>pBAD24                       |
| pBAD Seq R2                | GGCTGAAAATCTTCTCT                                                | Sequencing inserts in<br>pBAD24                       |
| panM for pGADT7 F          | CAGATTACGCTCATATGATGAAGCTGACCA<br>TTCTTCGT                       | Clone <i>panM</i> into bait<br>plasmid                |
| panM for pGADT7 R          | CGAGCTCGATGGATCCTTAGCGCTTCTCCC<br>AGCC                           | Clone <i>panM</i> into bait<br>plasmid                |
| panD for pGADT7 F          | CAGATTACGCTCATATGATGATTCGCACCA<br>TGCTG                          | Clone <i>panD</i> into bait<br>plasmid                |
| panD for pGADT7 R          | CGAGCTCGATGGATCCTCAGGCAACCTGT<br>ACCGGAAT                        | Clone <i>panD</i> into bait<br>plasmid                |
| panM for pGBKT7 F          | AGGAGGACCTGCATATGATGAAGCTGACC<br>ATTCTTCGT                       | Clone <i>panM</i> into prey<br>plasmid                |
| panM for pGBKT7 R          | GCAGGTCGACGGATCCTTAGCGCTTCTCC<br>CAGCC                           | Clone <i>panM</i> into prey<br>plasmid                |
| panD for pGBKT7 F          | AGGAGGACCTGCATATGATGATTCGCACCA<br>TGCTG                          | Clone <i>panD</i> into prey<br>plasmid                |
| panD for pGBKT7 R          | GCAGGTCGACGGATCCTCAGGCAACCTGT<br>ACCGGAAT                        | Clone <i>panD</i> into prey<br>plasmid                |
| T7 Terminator              | TATGCTAGTTATTGCTCAG                                              | Sequencing inserts in<br>all other vectors            |
| panM for pKLD66 F          | ATCTCTACTTCCAAGGTACCATGAAGCTGA<br>CCATTCTTCGT                    | Clone <i>panM</i> into<br>pKLD66                      |
| panM for pKLD66 R          | GTGCGGCCGCAAGCTTTTAGCGCTTCTCC<br>CAGCC <sup>1</sup>              | Clone <i>panM</i> into<br>pKLD66                      |
| panD pT7-7 F NdeI          | GAAGGAGATATACATATGATTCGCACCATG<br>CTG                            | Clone <i>panD</i> into pT7-7                          |
| panD pT7-7 R BamHI         | GACTCTAGAGGATCCTCAGGCAACCTGTAC<br>CGGAAT                         | Clone <i>panD</i> into pT7-7                          |

<sup>a</sup>All genes listed are *S. enterica* LT2 unless otherwise stated
